# Supplementary material
Source: publisher figshare collection journal article supplement (https://acs.figshare.com/ndownloader/files/29081625)
Supplement: Supplementary file 1 [file 29081625]

# Degradation Dependent Controlled Delivery of Doxorubicin by Glyoxal Crosslinked Magnetic and Porous Chitosan Microspheres

*Nechikkottil Sivadasan Sumitha<sup>1</sup>, Prabha Prakash<sup>2</sup>, Balagopal N. Nair<sup>3</sup>,*

*Gopalakrishnanchettiar Sivakamiammal Sailaja<sup>1,4,5\*</sup>*

<sup>1</sup>Department of Polymer Science and Rubber Technology, Cochin University of Science and Technology, Kochi-682 022, Kerala, India

<sup>2</sup>Department of Biotechnology, Cochin University of Science and Technology, Kochi-682 022, Kerala, India

<sup>3</sup>School of Molecular and Life Sciences (MLS), Faculty of Science and Engineering, Curtin University, GPO Box U1987, Perth WA6845, Australia

<sup>4</sup>Inter University Centre for Nanomaterials and Devices (IUCND), Cochin University of Science and Technology, Kochi-682 022, Kerala, India

<sup>5</sup>Centre for Excellence in Advanced Materials, Cochin University of Science and Technology, Kochi-682 022, Kerala, India.

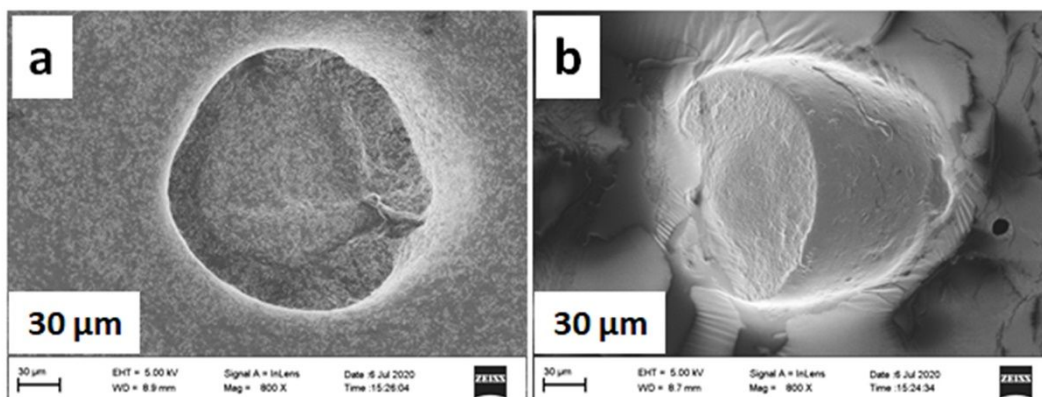

Figure S1. FESEM image of (a) GMS; (b) Cross section of GMS.

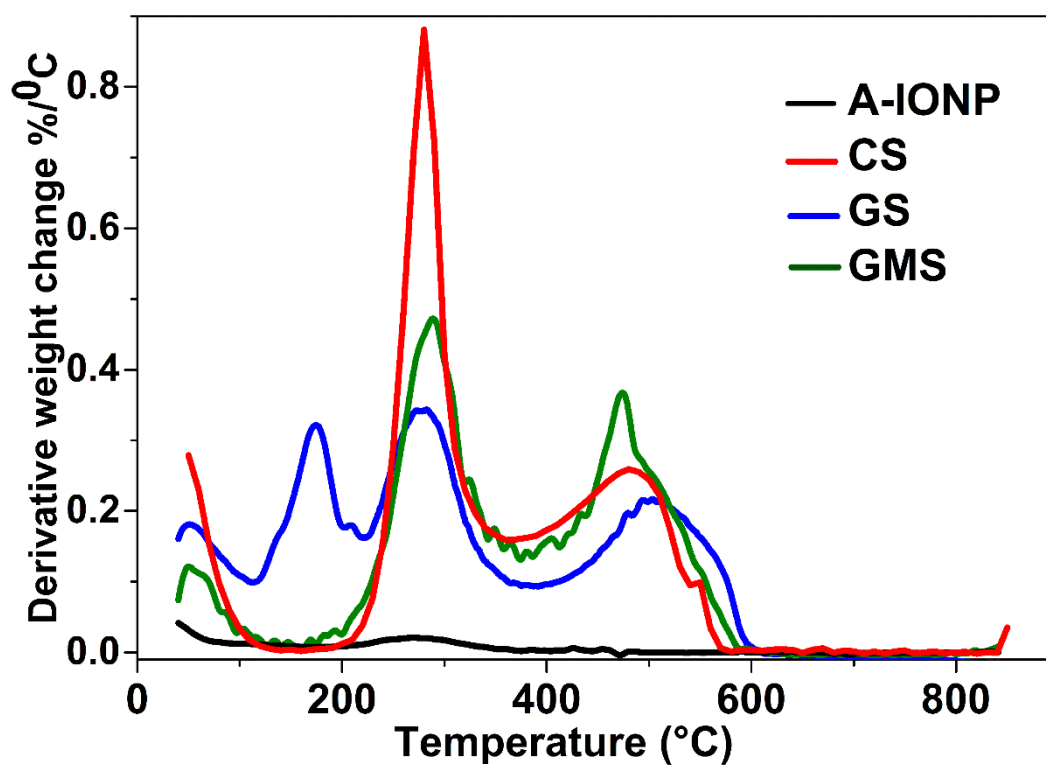

Figure S2. Differential thermogravimetric (DTG) curves of CS, GS, GMS and A-IONP.

**Table S1.**  $T_{50\%}$ ,  $T_{90\%}$  and residual weight (at 700 °C) of CS, GS, GMS and A-IONP from thermogravimetric analysis conducted under  $N_2$  atmosphere from 40-800 °C.

| Sample | $T_{50\%}$<br>(°C) | $T_{90\%}$<br>(°C) | Residual weight<br>at 800 °C (%) |
|--------|--------------------|--------------------|----------------------------------|
| CS     | 299                | 492                | 0                                |
| GS     | 278                | 524                | 0                                |
| GMS    | 394                | -                  | 12.8                             |
| A-IONP | -                  | -                  | 94.8                             |

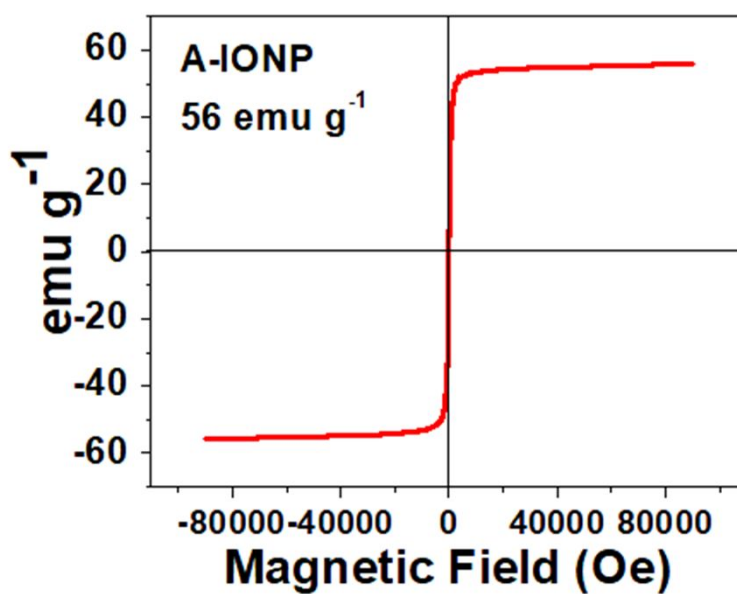

**Figure S3.** Magnetization curve of A-IONP recorded at room temperature with magnetic field sweeping from  $-80000$  Oe to  $+80000$  Oe.

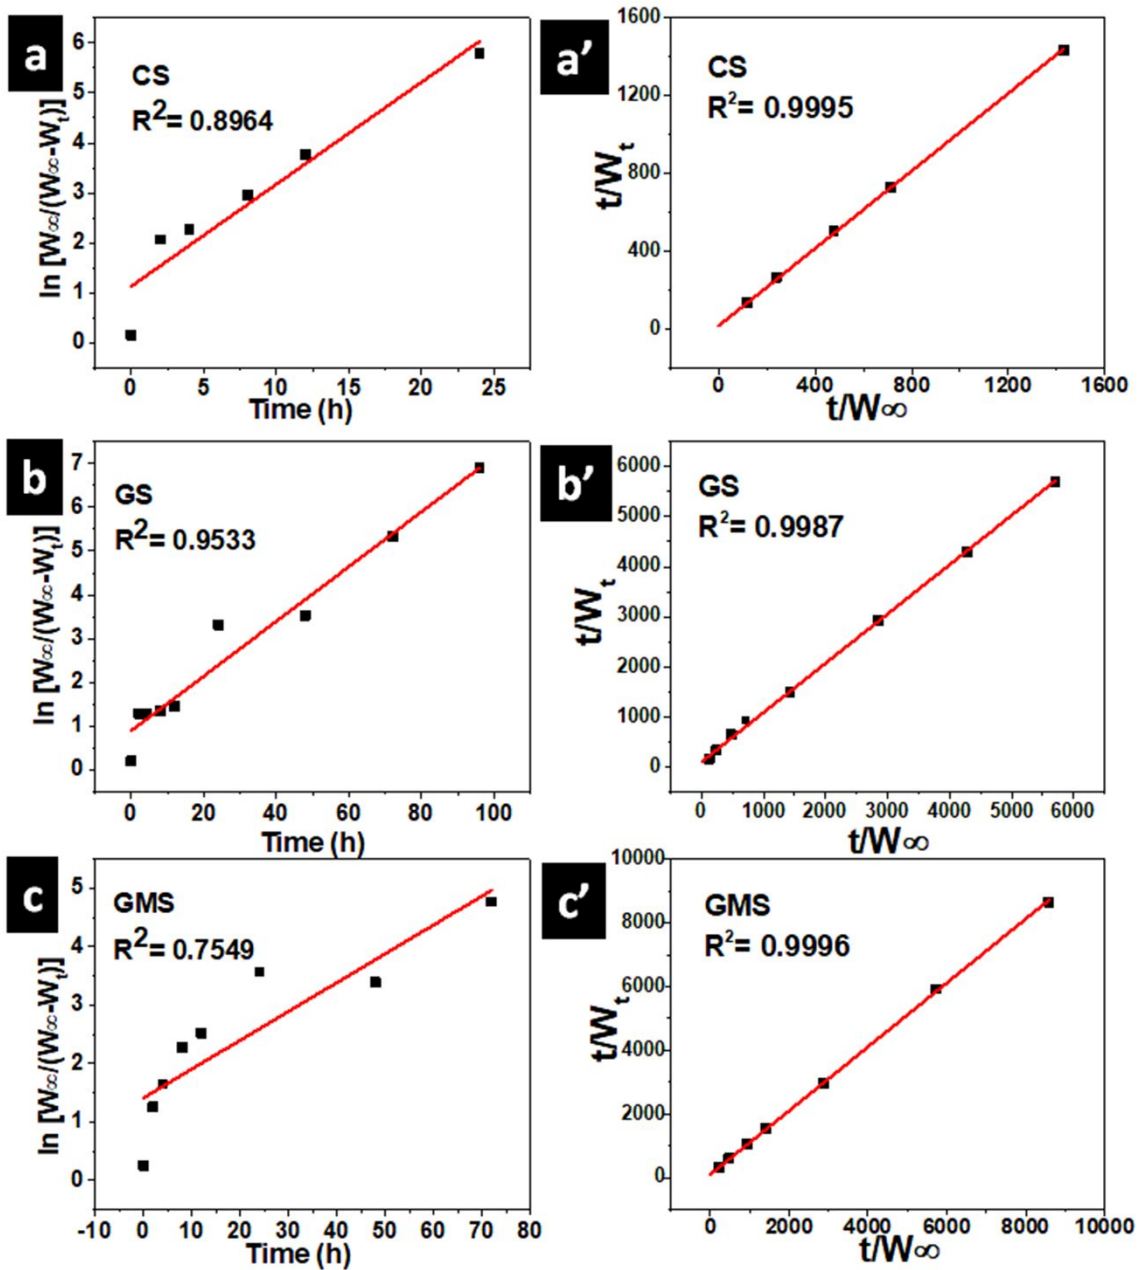

**Figure S4.** Swelling kinetic curve fitting by first order and second order kinetic models respectively: (a, a') CS; (b, b') GS; (c, c') GMS.
